# Supplementary material for: Preparation of novel heat-resistant and insensitive fused ring energetic materials
Source: Royal Society of Chemistry journal article supplement (doi:10.1039/d3ta06796c), 2024-01-01
Supplement: d3ta06796c1.pdf [file d3ta06796c1.pdf]

## Supporting Information (SI)

### **Preparation of Novel Heat-Resistant and Insensitive Fused Ring Energetic Materials**

Teng Zhu, Caijin Lei, Chengchuang Li, Hongwei Yang\*, Chuan Xiao \*, Guangbin Cheng \*

*School of Chemical Engineering, Nanjing University of Science and Technology, Xiaolingwei 200,  
Nanjing, Jiangsu, China. Fax: (+) 86 25 8430 3286*

E-mail: gcheng@mail.njust.edu.cn (G. Cheng), hyang@mail.njust.edu.cn (H. Yang)

## Table of Contents

|                                                                               |           |
|-------------------------------------------------------------------------------|-----------|
| <b>1. Computational details .....</b>                                         | <b>3</b>  |
| 1.1 Calculations of heats of formation.....                                   | 3         |
| 1.2 Calculations of the extrapolated peak temperature.....                    | 4         |
| <b>2. The experiment and crystallographic data.....</b>                       | <b>5</b>  |
| <b>3. <sup>1</sup>H and <sup>13</sup>C NMR spectra of new compounds .....</b> | <b>10</b> |
| <b>4. TG and DSC of new compounds .....</b>                                   | <b>15</b> |
| <b>5. The heat of combustion test of compounds 7 and 11.....</b>              | <b>17</b> |

# 1. Computational details

## 1.1 Calculations of heats of formation

The calculation was performed by using the Gaussian 09 program package<sup>1</sup>. The geometric optimization of all the structures and frequency analyses for calculation of heats of formation was carried out by using B3-LYP functional<sup>2</sup> with 6-311+G\*\* basis set<sup>3,4</sup>. All of the optimized structures were characterized to be local energy minima on the potential surface without any imaginary frequencies. The heats of formation (HOF) of these compounds were computed through appropriate isodesmic reactions (Scheme S1). Atomization energies were calculated by the CBS-4M<sup>5</sup>. Total energy and heat of formation for the reference compounds are summarized in Table S11. All the optimized structures were characterized to be true local energy minima on the potential-energy surface without imaginary frequencies.

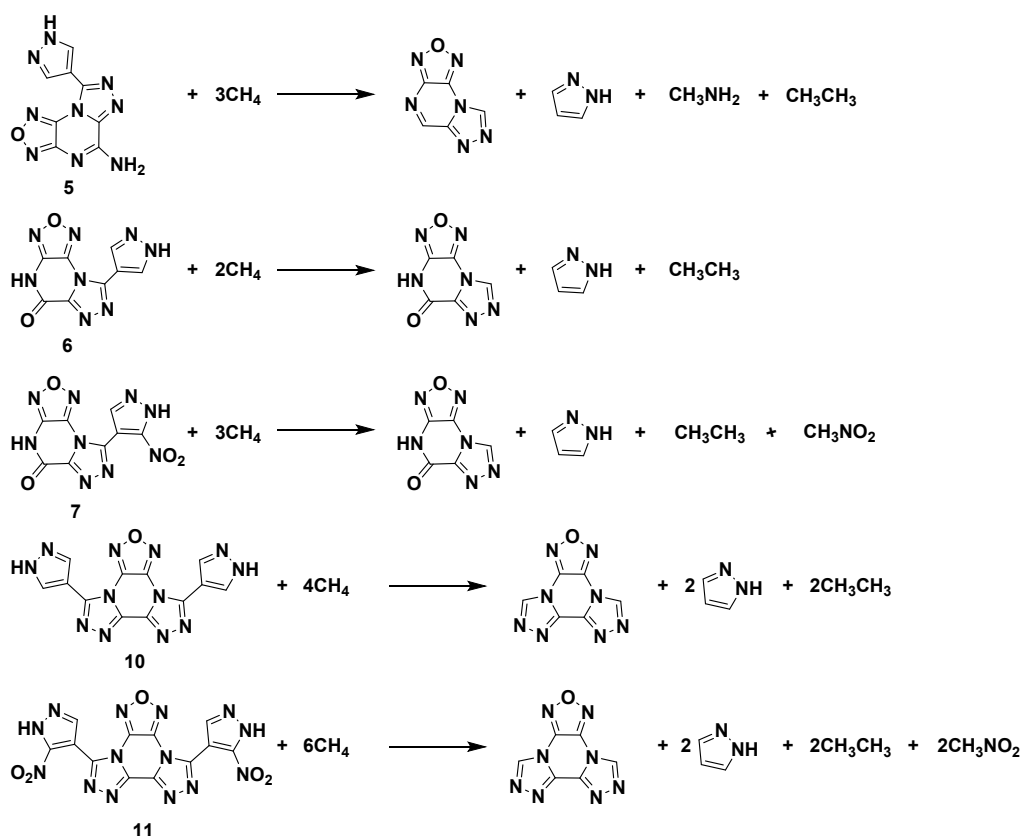

**Scheme S1** Isodesmic and tautomeric reactions to compute the HOF.

**Table S1** Total energy and heat of formation for the reference compounds

|   | $E_0/\text{a.u.}$ | ZPE / $\text{kJ}\cdot\text{mol}^{-1}$ | $\Delta\text{HT} / \text{kJ}\cdot\text{mol}^{-1}$ | HOF / $\text{kJ}\cdot\text{mol}^{-1}$ |
|---|-------------------|---------------------------------------|---------------------------------------------------|---------------------------------------|
| 5 | -875.9390         | 389.83                                | 37.05                                             | 737.04                                |

|                                                                                   |            |        |       |         |
|-----------------------------------------------------------------------------------|------------|--------|-------|---------|
| <b>6</b>                                                                          | -895.8100  | 359.23 | 36.03 | 552.40  |
| <b>7</b>                                                                          | -1100.3500 | 365.53 | 42.82 | 590.59  |
| <b>10</b>                                                                         | -1193.2200 | 519.63 | 49.14 | 1158.08 |
| <b>11</b>                                                                         | -1602.3100 | 532.10 | 62.48 | 1221.90 |
| CH <sub>4</sub>                                                                   | -40.5339   | 112.26 | 10.04 | -74.60  |
| CH <sub>3</sub> NH <sub>2</sub>                                                   | -95.8938   | 160.78 | 11.64 | -22.5   |
| CH <sub>3</sub> CH <sub>3</sub>                                                   | -79.8565   | 187.31 | 11.79 | -84.01  |
| CH <sub>3</sub> NO <sub>2</sub>                                                   | -245.092   | 124.93 | 11.60 | -80.80  |
| 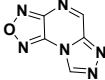 | -595.4680  | 216.37 | 22.09 | 612.94  |
|  | -226.2600  | 179.20 | 12.57 | 177.40  |
|  | -670.7390  | 228.55 | 25.36 | 373.01  |
|  | -743.0860  | 258.34 | 27.33 | 788.14  |

## References

- (1) M. J. Frisch, G. W. Trucks, H. B. Schlegel, G. E. Scuseria, M. A. Robb, J. R. Cheeseman, V. G. Zakrzewski, J. A. Montgomery, R. E. Stratmann, J. C. Burant, S. Dapprich, J. M. Millam, A. D. Daniels, K. N. Kudin, M. C. Strain, O. Farkas, J. Tomasi, V. Barone, M. Cossi, R. Cammi, B. Mennucci, C. Pomelli, C. Adamo, S. Clifford, J. Ochterski, G. A. Petersson, P. Y. Ayala, Q. Cui, K. Morokuma, D. K. Malick, A. D. Rabuck, K. Raghavachari, J. B. Foresman, J. Cioslowski, J. V. Ortiz, A. G. Baboul, B. B. Stefanov, G. Liu, A. Liashenko, P. Piskorz, I. Komaromi, R. Gomperts, R. L. Martin, D. J. Fox, T. Keith, M. A. Laham, C. Y. Peng, A. Nanayakkara, C. Gonzalez, M. Challacombe, P. M. W. Gill, B. Johnson, W. Chen, M. W. Wong, J. L. Andres, C. Gonzalez, M. Head-Gordon, E. S. Replogle and J. A. Pople. Gaussian 09, revision A. 01; Gaussian, Inc.: Wallingford, CT, 2009.
- (2) A. D. Becke, J. Phys. Chem. 1993, 98, 5648.
- (3) P. J. Stephens, F. J. Devlin, C. F. Chabalowski, M. J. Frisch, J. Phys. Chem. 1994, 98, 11623.
- (4) P. C. Hariharan, J. A. Pople. Theoretica Chimica Acta. 1973, 28, 213.
- (5) J. W. Ochterski, G. A. Petersson, J. A. Montgomery, J. Chem. Phys. 1996, 104, 2598.

## 1.2 Calculations of the extrapolated peak temperature

**Table S2** The calculated  $T_p$  and  $T_{p0}$  values of compound **6**, **7**, **11**, HNS and TATB at different heating rates

| Compound | $\beta / ^\circ\text{C}\cdot\text{min}^{-1}$ | $T_p / ^\circ\text{C}$ | $T_{p0} / ^\circ\text{C}$ |
|----------|----------------------------------------------|------------------------|---------------------------|
| <b>6</b> | 5                                            | 377                    | 372                       |
|          | 10                                           | 385                    |                           |
|          | 15                                           | 392                    |                           |
|          | 20                                           | 394                    |                           |
| <b>7</b> | 5                                            | 375                    | 363                       |

|           |    |     |     |
|-----------|----|-----|-----|
|           | 10 | 384 |     |
|           | 15 | 390 |     |
|           | 20 | 393 |     |
| <b>11</b> | 5  | 349 | 335 |
|           | 10 | 359 |     |
|           | 15 | 365 |     |
|           | 20 | 367 |     |
| HNS       | 5  | 332 | 328 |
|           | 10 | 340 |     |
|           | 15 | 351 |     |
|           | 20 | 364 |     |
| TATB      | 5  | 368 | 349 |
|           | 10 | 379 |     |
|           | 15 | 385 |     |
|           | 20 | 389 |     |

$$T_{pi} = T_{p0} + b\beta_i + c\beta_i^2 + d\beta_i^3, \quad i = 1, 2, 3, \dots, N \quad (1)$$

Note: 1)  $\beta$  is the heating rate of the sample. 2)  $T_{pi}$  is the peak temperature of the sample when the heating rate is  $\beta$ . 3)  $T_{p0}$  is the peak temperature of the sample when the heating rate approaches zero.

## 2. The experiment and crystallographic data

### Experimental section

**Caution!** Although we experienced no explosion in handling these energetic materials, the use of small scale and best safety practices (leather gloves, face shield) are strongly encouraged!

### General methods

Reagents were purchased from Aldrich and Acros Organics and are used as received.  $^1\text{H}$  and  $^{13}\text{C}$  NMR spectra are recorded on a 500 MHz (Bruker AVANCE 500) NMR spectrometer operating at 500 and 125 MHz, respectively. The decomposition points are obtained on a differential scanning calorimeter (METTLER TGA/DSC1) at a heating rate of  $5^\circ\text{C min}^{-1}$ . IR spectra are recorded on a FT-IR spectrometer (Thermo Nicolet AVATAR 370) as thin films by using KBr plates. Densities are determined at  $25^\circ\text{C}$  by employing a Micromeritics AccuPyc II 1340 gas pycnometer. Elemental analyses were carried out by using a Vario Micro cube Elementar Analyser. Impact and friction sensitivity measurements are made by using a standard BAM Fall hammer and a BAM friction tester. Detonation velocity and detonation pressure data are calculated by program package EXPLO5 (version 6.01). The heat of combustion is tested by Pahi 6200 Calorimeter. The samples were dried in a hydrothermal oven at  $40^\circ\text{C}$  at least for 24 hours to remove the solvent before all tests. There is no solvent peak in the TG of the dry sample.

## X-ray crystallography

The data for **6**·CH<sub>3</sub>OH, **7** and **11**·CH<sub>3</sub>OH were collected with a Bruker SMART APEX II CCD diffractometer with graphite-monochromated Mo-K $\alpha$  radiation ( $\lambda=0.71073$  nm) at 170 K. The data collection and the initial unit cell refinement are performed by using APEX2 (v2010.3-0). Data Reduction is performed by using SAINT (v7.68A) and XPREP (v2008/2). Empirical absorption corrections are applied by using the SADABS (v2008/1) program. The structures are solved by direct methods and refined by the full matrix least-squares based on F2 using SHELXTL--2014/7 (Sheldrick, 2014) programme package. All non-hydrogen atoms were refined anisotropically. The hydrogen atoms attached to ligands are included using a riding model. The crystallographic data and CCDC numbers for these compounds are summarized in Table S2

**Table S3** Crystallographic Data for **6**·CH<sub>3</sub>OH, **7** and **11**·CH<sub>3</sub>OH

| Compound                                                | <b>6</b> ·CH <sub>3</sub> OH                                | <b>7</b>                                                    | <b>11</b> ·CH <sub>3</sub> OH                                 |
|---------------------------------------------------------|-------------------------------------------------------------|-------------------------------------------------------------|---------------------------------------------------------------|
| <b>Empirical formula</b>                                | C <sub>9</sub> H <sub>8</sub> N <sub>8</sub> O <sub>3</sub> | C <sub>8</sub> H <sub>3</sub> N <sub>9</sub> O <sub>4</sub> | C <sub>13</sub> H <sub>8</sub> N <sub>14</sub> O <sub>6</sub> |
| <b>Formula weight</b>                                   | 276.23                                                      | 289.19                                                      | 456.33                                                        |
| <b>Temperature/K</b>                                    | 193.00                                                      | 170                                                         | 193.00                                                        |
| <b>Crystal system</b>                                   | monoclinic                                                  | trigonal                                                    | triclinic                                                     |
| <b>Space group</b>                                      | P2 <sub>1</sub> /c                                          | R-3                                                         | P-1                                                           |
| <b>a/Å</b>                                              | 8.7309(4)                                                   | 23.212(3)                                                   | 7.2696(8)                                                     |
| <b>b/Å</b>                                              | 19.6818(10)                                                 | 23.212(3)                                                   | 10.8752(12)                                                   |
| <b>c/Å</b>                                              | 6.9104(4)                                                   | 11.2896(19)                                                 | 12.1046(14)                                                   |
| <b><math>\alpha</math>/°</b>                            | 90                                                          | 90                                                          | 93.652(5)                                                     |
| <b><math>\beta</math>/°</b>                             | 105.115(3)                                                  | 90                                                          | 102.562(6)                                                    |
| <b><math>\gamma</math>/°</b>                            | 90                                                          | 120                                                         | 103.331(5)                                                    |
| <b>Volume/Å<sup>3</sup></b>                             | 1146.40(10)                                                 | 5267.8(15)                                                  | 902.34(18)                                                    |
| <b>Z</b>                                                | 4                                                           | 18                                                          | 2                                                             |
| <b><math>\rho_{\text{calc}}</math> g/cm<sup>3</sup></b> | 1.600                                                       | 1.641                                                       | 1.680                                                         |
| <b><math>\mu</math>/mm<sup>-1</sup></b>                 | 1.085                                                       | 0.137                                                       | 0.764                                                         |
| <b>F (000)</b>                                          | 568.0                                                       | 2628.0                                                      | 464.0                                                         |
| <b>Crystal size/mm<sup>3</sup></b>                      | 0.13 × 0.12 × 0.11                                          | 0.11 × 0.04 × 0.02                                          | 0.11 × 0.1 × 0.08                                             |

|                                                                             |                                                                  |                                                                  |                                                                  |
|-----------------------------------------------------------------------------|------------------------------------------------------------------|------------------------------------------------------------------|------------------------------------------------------------------|
| <b>Radiation</b>                                                            | CuK $\alpha$ ( $\lambda$ = 1.54178)                              | MoK $\alpha$ ( $\lambda$ = 0.71073)                              | GaK $\alpha$ ( $\lambda$ = 1.34139)                              |
| <b>2<math>\theta</math> range for data collection/<math>^{\circ}</math></b> | 8.986 to 135.84                                                  | 4.138 to 52.71                                                   | 6.556 to 107.902                                                 |
|                                                                             | -10 $\leq$ h $\leq$ 8,                                           | 21 $\leq$ h $\leq$ 28,                                           | -8 $\leq$ h $\leq$ 8,                                            |
| <b>Index ranges</b>                                                         | -20 $\leq$ k $\leq$ 23,<br>-6 $\leq$ l $\leq$ 8                  | -28 $\leq$ k $\leq$ 28,<br>-12 $\leq$ l $\leq$ 14                | -13 $\leq$ k $\leq$ 13,<br>-14 $\leq$ l $\leq$ 14                |
| <b>Reflections collected</b>                                                | 10625                                                            | 10264                                                            | 8244                                                             |
| <b>Independent reflections</b>                                              | 2076 [R <sub>int</sub> = 0.0440,<br>R <sub>sigma</sub> = 0.0305] | 2389 [R <sub>int</sub> = 0.0889,<br>R <sub>sigma</sub> = 0.0788] | 3249 [R <sub>int</sub> = 0.0859,<br>R <sub>sigma</sub> = 0.0909] |
| <b>Data/restraints/parameters</b>                                           | 2076/0/187                                                       | 2389/2/198                                                       | 3249/1/304                                                       |
| <b>Goodness-of-fit on F<sup>2</sup></b>                                     | 1.069                                                            | 1.063                                                            | 1.069                                                            |
| <b>Final R indexes [I <math>\geq</math> 2<math>\sigma</math> (I)]</b>       | R <sub>1</sub> = 0.0401,<br>wR <sub>2</sub> = 0.1047             | R <sub>1</sub> = 0.0566,<br>wR <sub>2</sub> = 0.1240             | R <sub>1</sub> = 0.0872,<br>wR <sub>2</sub> = 0.2279             |
| <b>Final R indexes [all data]</b>                                           | R <sub>1</sub> = 0.0487,<br>wR <sub>2</sub> = 0.1118             | R <sub>1</sub> = 0.1063,<br>wR <sub>2</sub> = 0.1601             | R <sub>1</sub> = 0.1205,<br>wR <sub>2</sub> = 0.2455             |
| <b>Largest diff. peak/hole / e <math>\text{\AA}^{-3}</math></b>             | 0.23/-0.22                                                       | 0.31/-0.39                                                       | 0.67/-0.53                                                       |
| <b>CCDC No.</b>                                                             | 2303258                                                          | 2303259                                                          | 2303260                                                          |

**Table S4.** Bond lengths [ $\text{\AA}$ ] and angles [ $^{\circ}$ ] for **6**-CH<sub>3</sub>OH.

| <b>Parameter</b> | <b>Bond lengths [<math>\text{\AA}</math>]</b> | <b>Parameter</b> | <b>Bond lengths [<math>\text{\AA}</math>]</b> |
|------------------|-----------------------------------------------|------------------|-----------------------------------------------|
| O1-C1            | 1.210(2)                                      | N3-C4            | 1.293(2)                                      |
| O2-N2            | 1.403(2)                                      | N4-C5            | 1.383(2)                                      |
| O2-N3            | 1.385(2)                                      | N4-C3            | 1.388(2)                                      |
| O3-C9            | 1.424(3)                                      | N4-C4            | 1.391(2)                                      |
| O3-H3            | 0.8400                                        | N5-C3            | 1.308(2)                                      |
| N1-C2            | 1.367(2)                                      | N5-N6            | 1.383(2)                                      |
| N1-C1            | 1.373(2)                                      | N6-C5            | 1.318(2)                                      |
| N2-C2            | 1.302(2)                                      | N7-C8            | 1.333(2)                                      |
| <b>Parameter</b> | <b>Bond angles [<math>^{\circ}</math>]</b>    | <b>Parameter</b> | <b>Bond lengths [<math>\text{\AA}</math>]</b> |
| N2-O2 -N3        | 111.61(14)                                    | C2-N1 -H1        | 118.2(16)                                     |
| C9-O3 -H3        | 109.00                                        | C1-N1 -H1        | 120.5(16)                                     |
| C1-N1 -C2        | 120.27(16)                                    | N7-N8 -H8        | 124.00                                        |
| O2-N2 -C2        | 104.13(15)                                    | C7-N8 -H8        | 124.00                                        |

|           |            |           |            |
|-----------|------------|-----------|------------|
| O2-N3 -C4 | 104.10(15) | N1-C1 -C3 | 115.70(16) |
| C3-N4 -C4 | 117.23(14) | O1-C1 -N1 | 122.92(17) |
| C4-N4 -C5 | 137.76(15) | O1-C1 -C3 | 121.38(16) |
| C3-N4 -C5 | 105.01(13) | N1-C2 -N2 | 126.74(17) |
| N6-N5 -C3 | 107.47(14) | N1-C2 -C4 | 123.97(16) |
| N5-N6 -C5 | 108.68(13) | N2-C2 -C4 | 109.28(16) |
| N8-N7 -C8 | 104.77(14) | N5-C3 -C1 | 126.22(16) |
| N7-N8 -C7 | 112.68(15) | N4-C3 -C1 | 123.80(15) |

**Table S5.** Bond lengths [Å] and angles [°] for **7**.

| Parameter | Bond lengths [Å] | Parameter | Bond lengths [Å] |
|-----------|------------------|-----------|------------------|
| O1-N1     | 1.396(4)         | N3-C3     | 1.369(5)         |
| O1-N2     | 1.396(3)         | N4-C1     | 1.390(5)         |
| O2-N9     | 1.227(3)         | N4-C4     | 1.367(4)         |
| O3-N9     | 1.224(4)         | N4-C5     | 1.377(4)         |
| O4-C3     | 1.219(4)         | N5-N6     | 1.386(3)         |
| N1-C1     | 1.294(5)         | N6-C5     | 1.322(5)         |
| N2-C2     | 1.309(5)         | N7-N8     | 1.353(4)         |
| N3-C2     | 1.363(5)         | N7-C8     | 1.340(5)         |
| Parameter | Bond angles [°]  | Parameter | Bond lengths [Å] |
| N1-O1 -N2 | 112.1(3)         | O2-N9 -C7 | 117.4(3)         |
| O1-N1 -C1 | 103.0(2)         | O3-N9 -C7 | 117.8(3)         |
| O1-N2 -C2 | 104.3(3)         | C2-N3 -H3 | 124(3)           |
| C2-N3 -C3 | 120.7(3)         | C3-N3 -H3 | 115(3)           |
| C1-N4 -C4 | 118.4(3)         | N8-N7 -H7 | 120(2)           |
| C1-N4 -C5 | 135.8(3)         | C8-N7 -H7 | 127(2)           |
| C4-N4 -C5 | 105.3(3)         | N1-C1 -N4 | 129.9(3)         |
| N6-N5 -C4 | 107.2(3)         | N1-C1 -C2 | 112.0(3)         |
| N5-N6 -C5 | 108.0(3)         | N4-C1 -C2 | 118.1(3)         |
| N8-N7 -C8 | 113.3(3)         | N2-C2 -C1 | 108.6(3)         |
| N7-N8 -C7 | 102.8(3)         | N3-C2 -C1 | 123.7(4)         |
| O2-N9 -O3 | 124.8(3)         | N2-C2 -N3 | 127.7(3)         |
| N1-O1 -N2 | 112.1(3)         | O4-C3 -N3 | 123.1(3)         |

**Table S6.** Bond lengths [Å] and angles [°] for **11**·CH<sub>3</sub>OH.

| Parameter | Bond lengths [Å] | Parameter | Bond lengths [Å] |
|-----------|------------------|-----------|------------------|
| O1-N1     | 1.392(4)         | N1-C1     | 1.294(5)         |
| O1-N2     | 1.398(4)         | N2-C2     | 1.303(5)         |
| O2-N11    | 1.223(5)         | N3-C1     | 1.396(4)         |
| O3-N11    | 1.235(5)         | N3-C5     | 1.380(5)         |



| O4-N14     | 1.216(6)        | N3-C4      | 1.367(4)         |
|------------|-----------------|------------|------------------|
| O5-N14     | 1.220(5)        | N4-N5      | 1.395(5)         |
| O6-C13     | 1.455(8)        | N4-C5      | 1.312(5)         |
| O6-H6      | 0.8400          | N5-C4      | 1.307(5)         |
| Parameter  | Bond angles [°] | Parameter  | Bond lengths [Å] |
| N1-O1 -N2  | 112.5(3)        | N8-N7 -C9  | 108.4(3)         |
| C13-O6 -H6 | 110.00          | N7-N8 -C3  | 106.7(3)         |
| O1-N1 -C1  | 103.8(3)        | N10-N9-C7  | 113.3(3)         |
| O1-N2 -C2  | 103.3(3)        | N9 -N1-C8  | 103.6(3)         |
| C1-N3 -C5  | 134.3(3)        | O2 -N1-O3  | 124.1(4)         |
| C4-N3 -C5  | 105.3(3)        | O2 -N1-C8  | 118.2(3)         |
| C1-N3 -C4  | 120.3(3)        | O3 -N1-C8  | 117.7(4)         |
| N5-N4 -C5  | 108.4(3)        | N13-N1-C11 | 112.9(3)         |
| N4-N5 -C4  | 106.6(3)        | N12-N1-C12 | 103.0(3)         |
| C2-N6 -C3  | 120.7(3)        | O4 -N1-O5  | 124.1(5)         |
| C2-N6 -C9  | 134.7(3)        | O4 -N1-C12 | 118.9(4)         |
| C3-N6 -C9  | 104.4(3)        | O5 -N1-C12 | 117.1(4)         |

**Table S7** Hydrogen bonds of **6**·CH<sub>3</sub>OH

| D-H···A     | d(D-H)/Å | d(H···A)/ Å | d(D···A)/Å | <(DHA)/ ° |
|-------------|----------|-------------|------------|-----------|
| N1-H1···O3  | 0.96(3)  | 1.72(3)     | 2.667(2)   | 178       |
| O3-H3···N7  | 0.84     | 1.92        | 2.7611(19) | 177       |
| N8-H8···N5  | 0.88     | 2.17        | 3.053(2)   | 123       |
| C7-H7···O1  | 0.95     | 2.36        | 2.983(2)   | 137       |
| C7-H7···N3  | 0.95     | 2.23        | 2.997(2)   | 145       |
| C9-H9A···O2 | 0.98     | 2.49        | 3.340(3)   | 178       |

**Table S8** Hydrogen bonds of **7**

| D-H···A    | d(D-H)/Å | d(H···A)/ Å | d(D···A)/Å | <(DHA)/ ° |
|------------|----------|-------------|------------|-----------|
| N7-H7···N5 | 0.88(3)  | 2.12(3)     | 2.997(4)   | 172(4)    |
| C8-H8···O4 | 0.95     | 2.47        | 2.995(4)   | 115       |

**Table S9** Hydrogen bonds of **11**·CH<sub>3</sub>OH

| D-H···A      | d(D-H)/Å | d(H···A)/ Å | d(D···A)/Å | <(DHA)/ ° |
|--------------|----------|-------------|------------|-----------|
| O6-H6···N8   | 0.84     | 2.11        | 2.933(5)   | 165       |
| N9-H9···O6   | 0.91(2)  | 1.81(2)     | 2.693(5)   | 163(4)    |
| N12-H12···N4 | 0.88     | 2.12        | 2.922(5)   | 151       |
| C7-H7···O2   | 0.95     | 2.3         | 3.126(5)   | 145       |
| C11-H11···O6 | 0.95     | 2.47        | 3.280(6)   | 143       |

### 3. $^1\text{H}$ and $^{13}\text{C}$ NMR spectra of new compounds

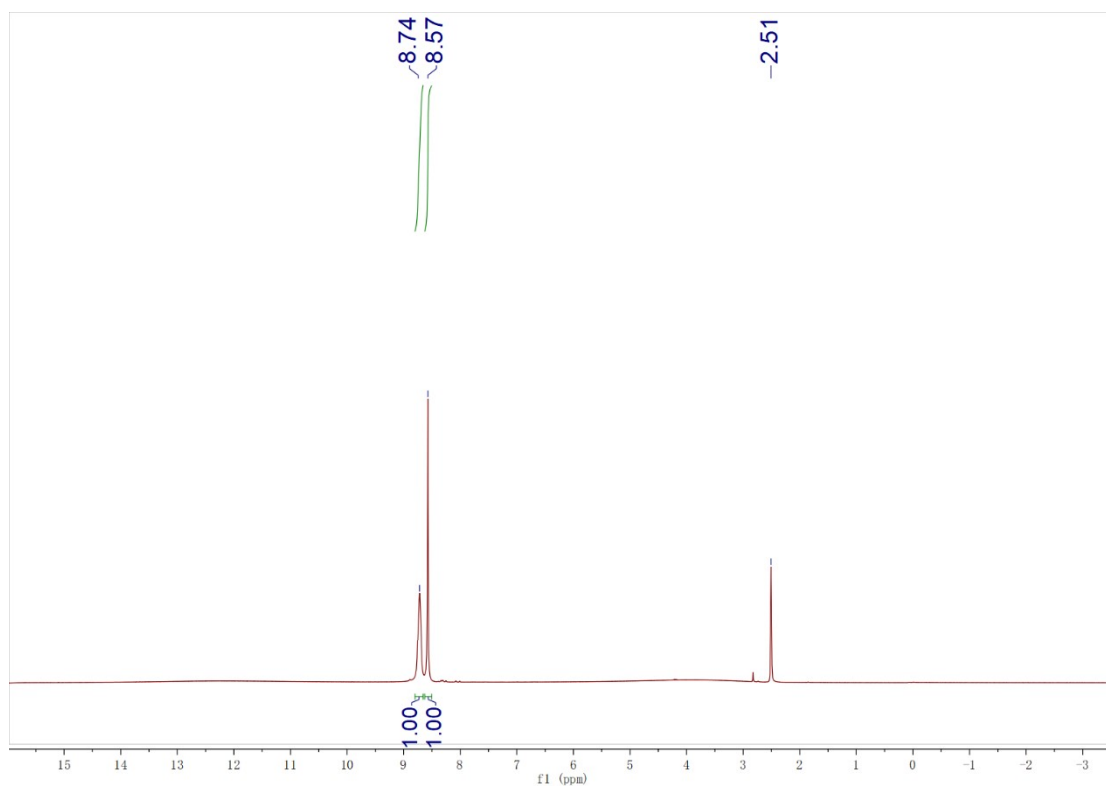

Figure S1  $^1\text{H}$  NMR spectra (500 MHz) of **5** in  $[\text{D}_6]$  DMSO at 25 °C.

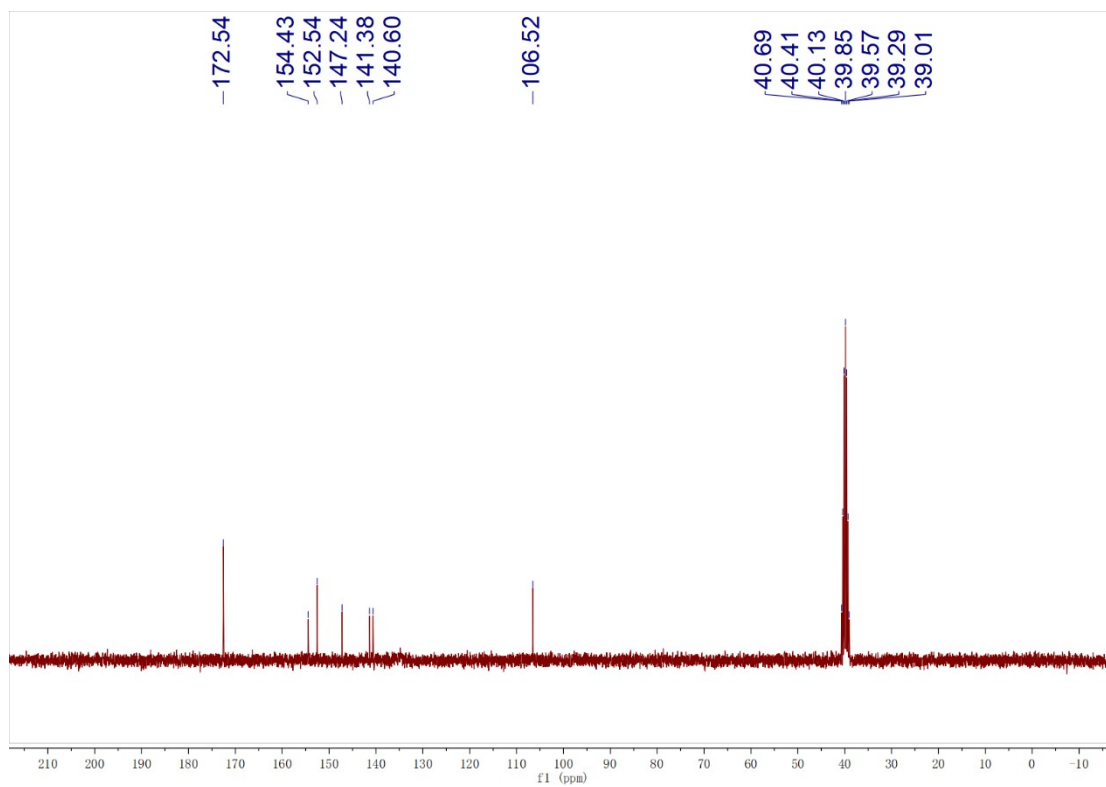

**Figure S2**  $^{13}\text{C}$  NMR spectra (125 MHz) of **5** in  $[\text{D}_6]$  DMSO at 25 °C.

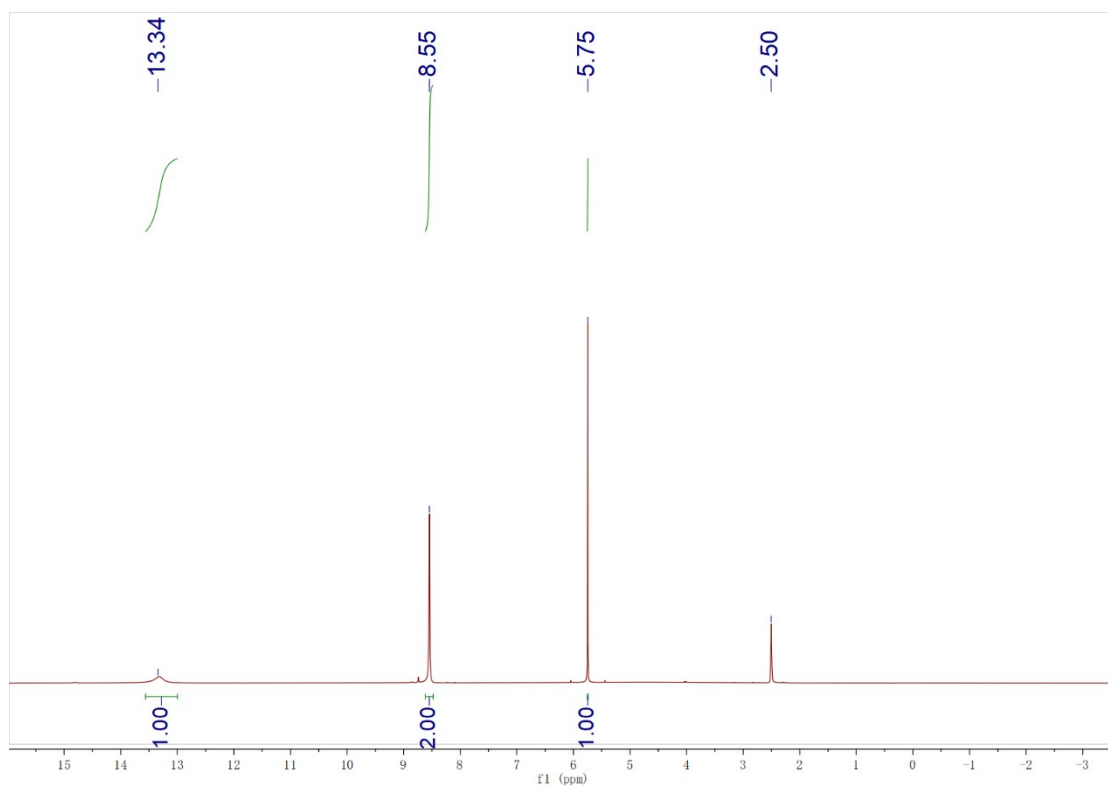

**Figure S3**  $^1\text{H}$  NMR spectra (500 MHz) of **6** in  $[\text{D}_6]$  DMSO at 25 °C.

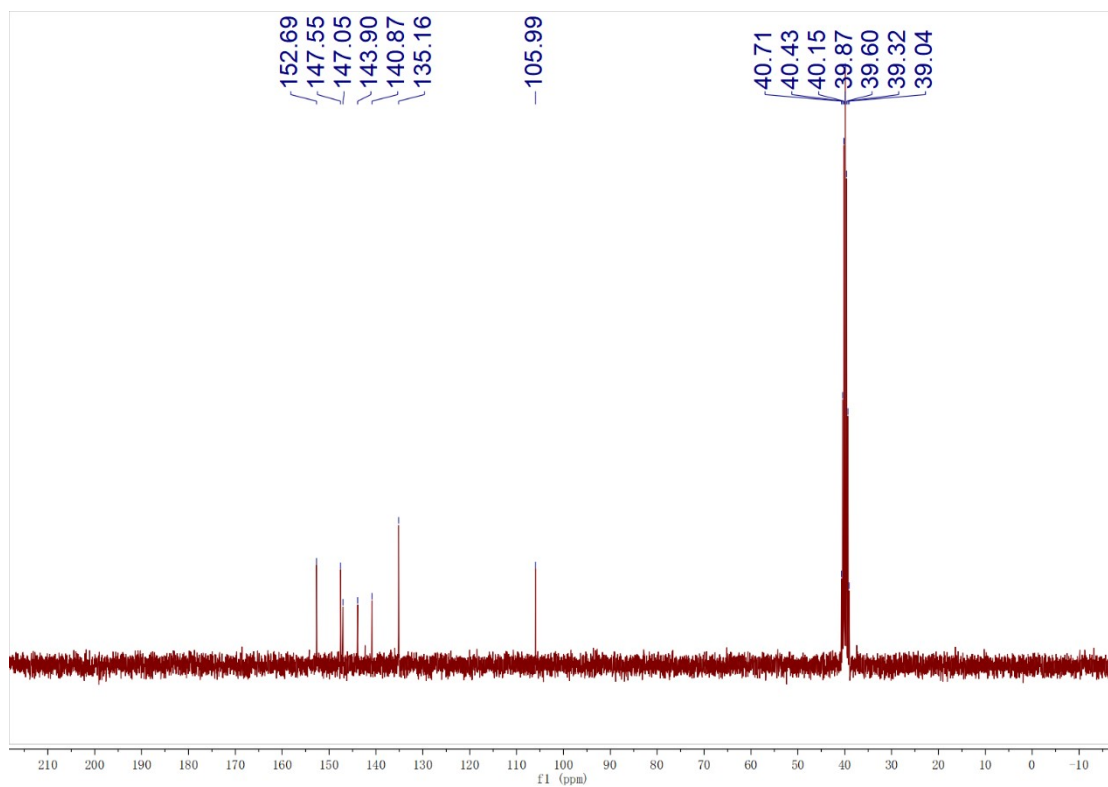

**Figure S4**  $^{13}\text{C}$  NMR spectra (125 MHz) of **6** in  $[\text{D}_6]$  DMSO at 25 °C.

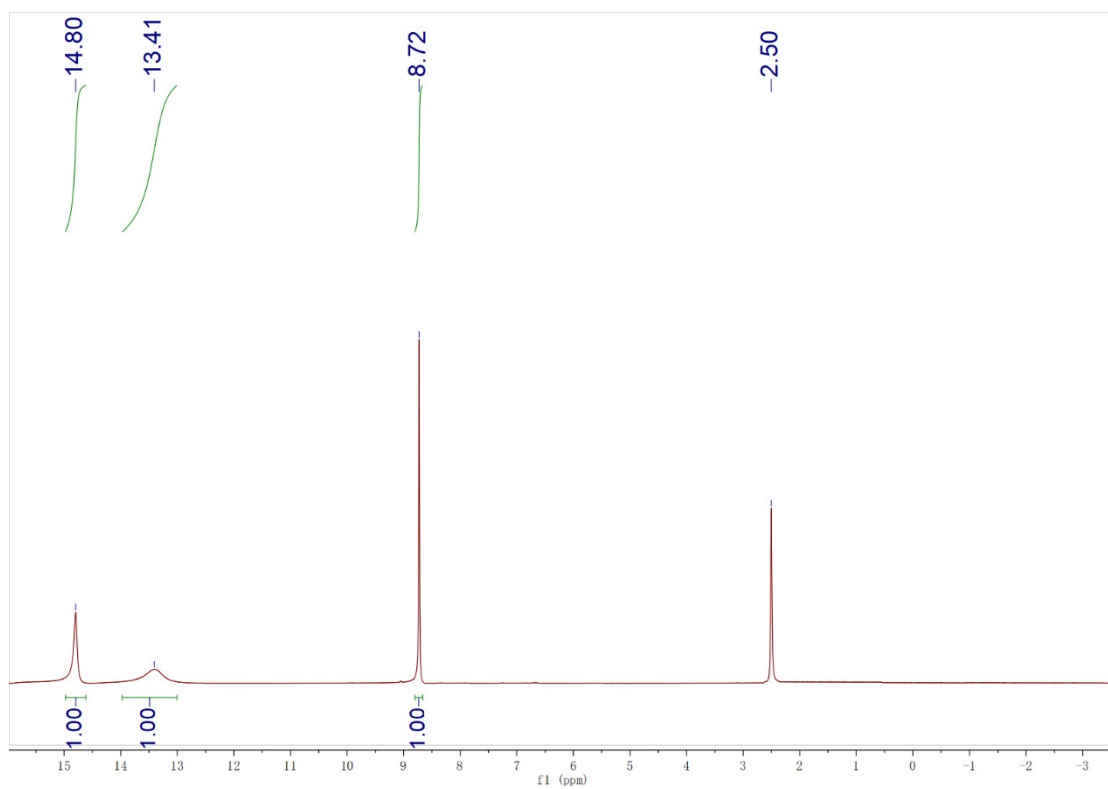

**Figure S5**  $^1\text{H}$  NMR spectra (500 MHz) of 7 in  $[\text{D}_6]$  DMSO at 25 °C.

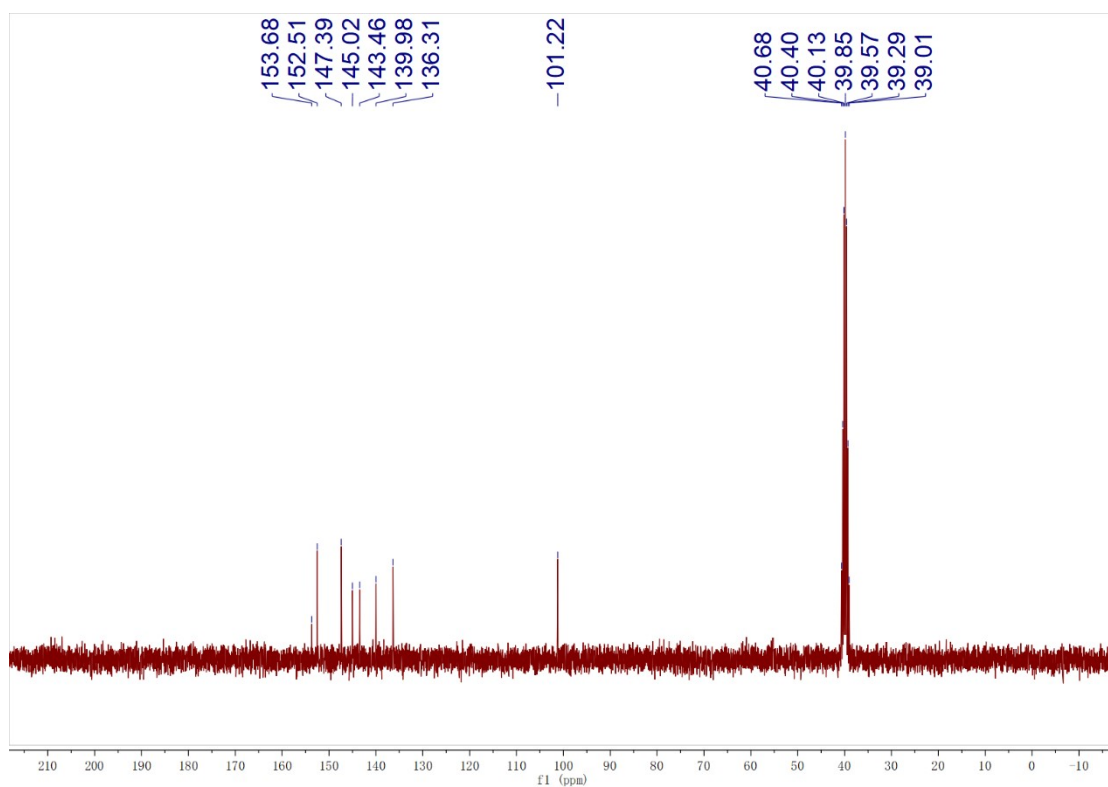

**Figure S6**  $^{13}\text{C}$  NMR spectra (125 MHz) of 7 in  $[\text{D}_6]$  DMSO at 25 °C.

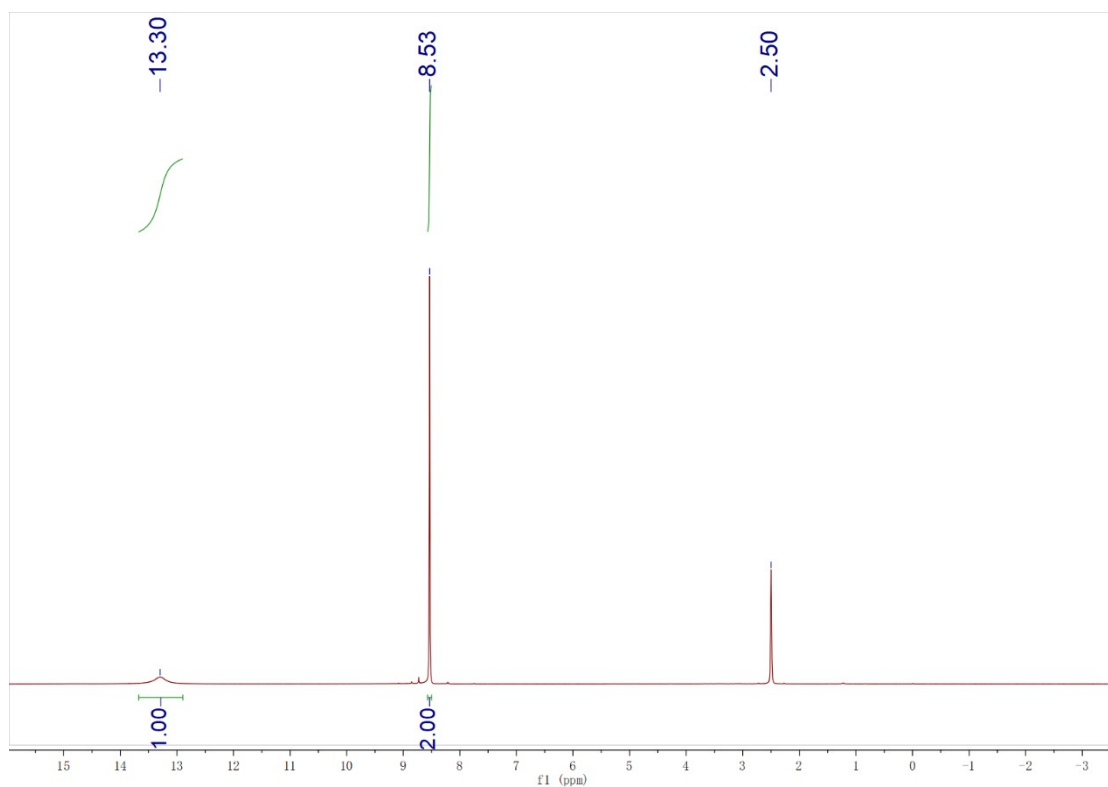

**Figure S7**  $^1\text{H}$  NMR spectra (500 MHz) of **10** in  $[\text{D}_6]$  DMSO at 25 °C.

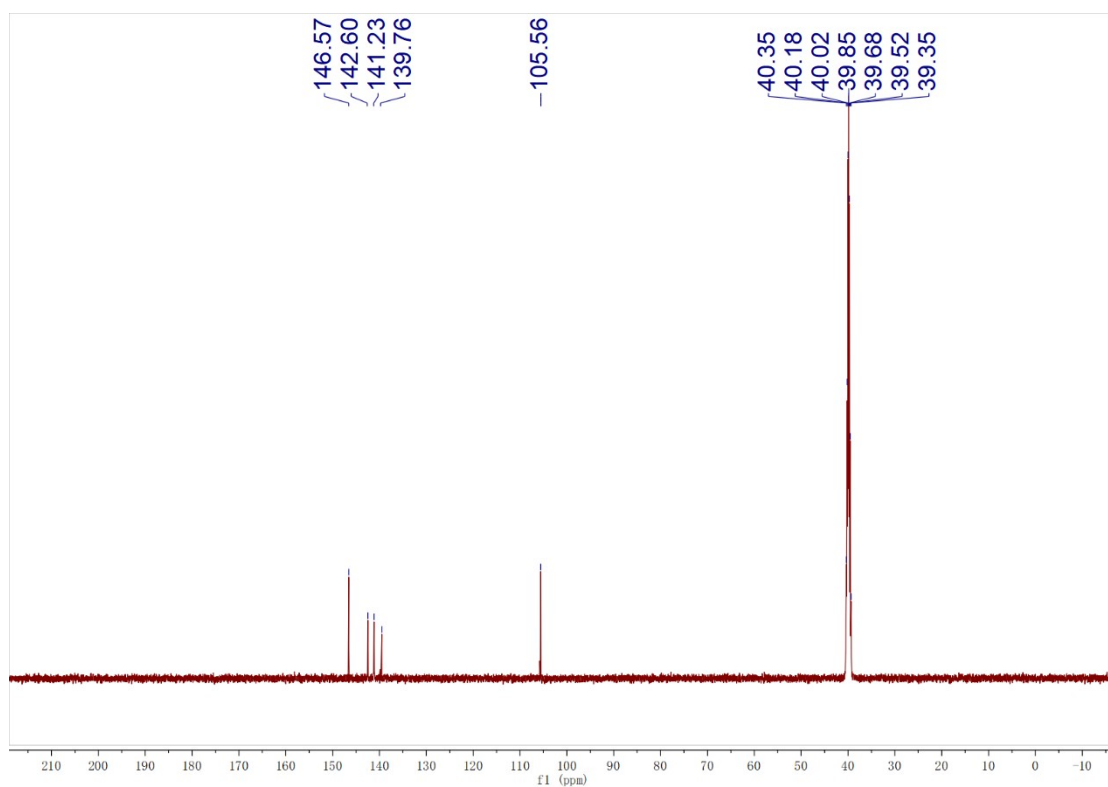

**Figure S8**  $^{13}\text{C}$  NMR spectra (125 MHz) of **10** in  $[\text{D}_6]$  DMSO at 25 °C.

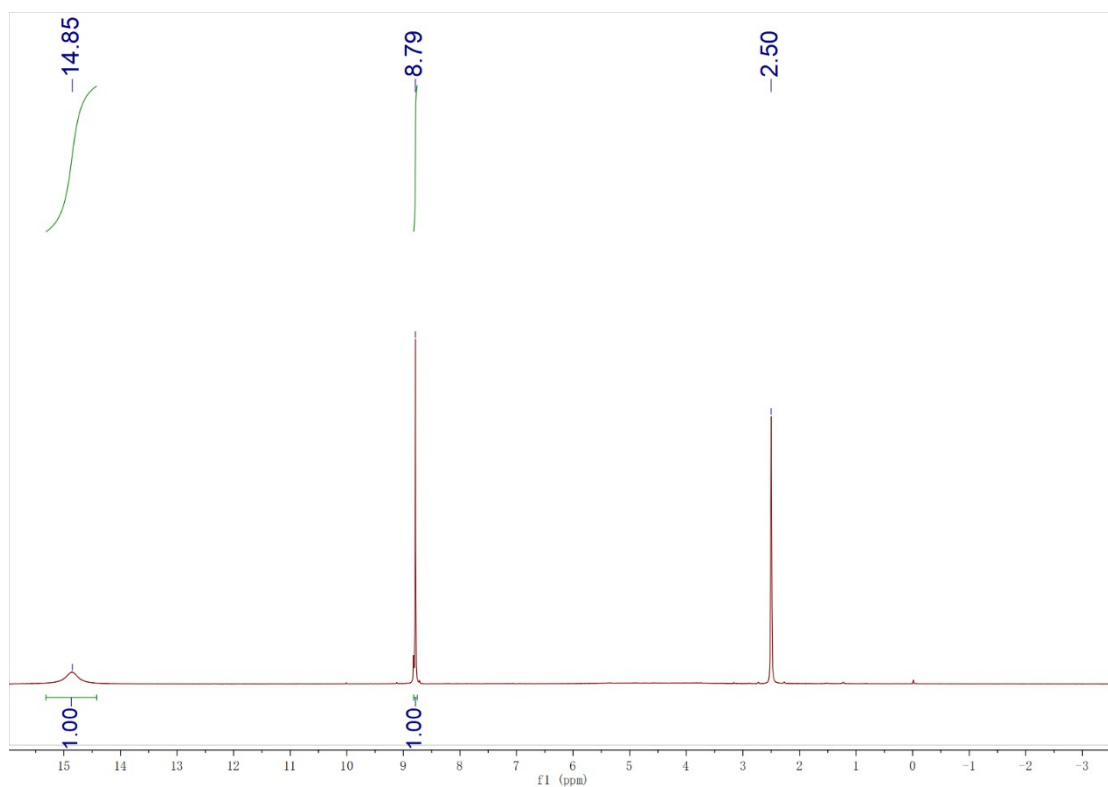

**Figure S9**  $^1\text{H}$  NMR spectra (500 MHz) of **11** in  $[\text{D}_6]$  DMSO at 25 °C.

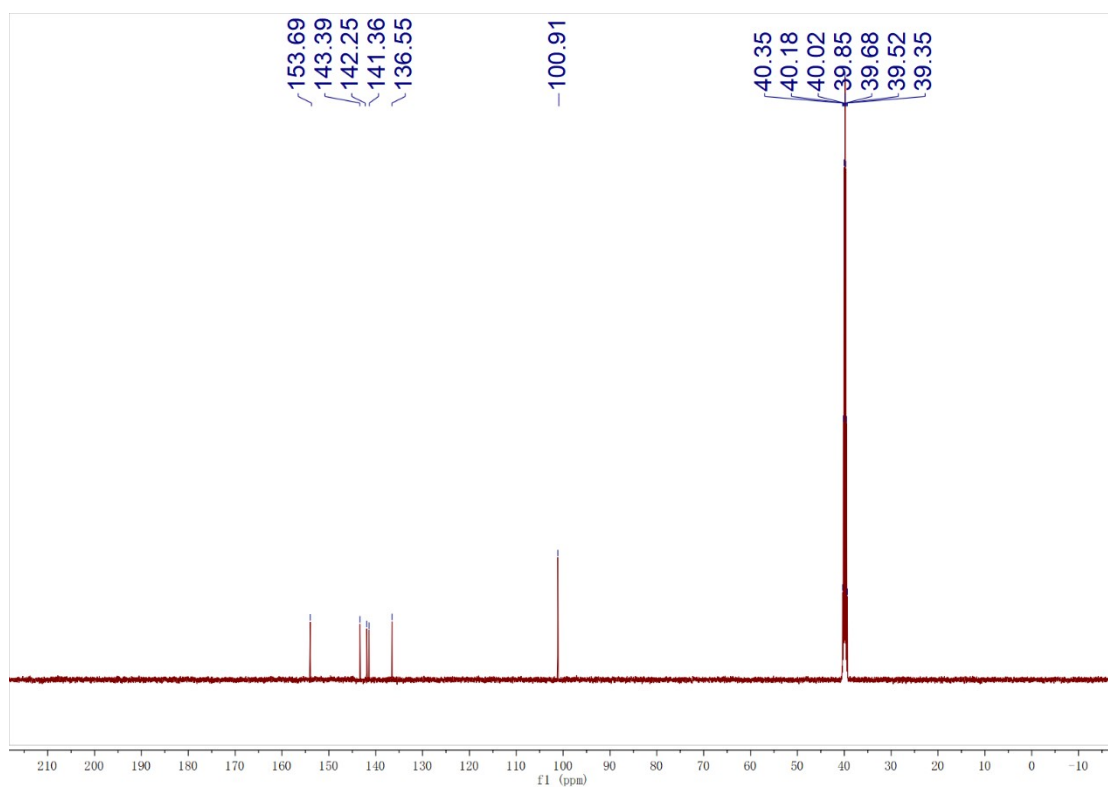

**Figure S10**  $^{13}\text{C}$  NMR spectra (125 MHz) of **11** in  $[\text{D}_6]$  DMSO at 25 °C.

#### 4. TG and DSC of new compounds

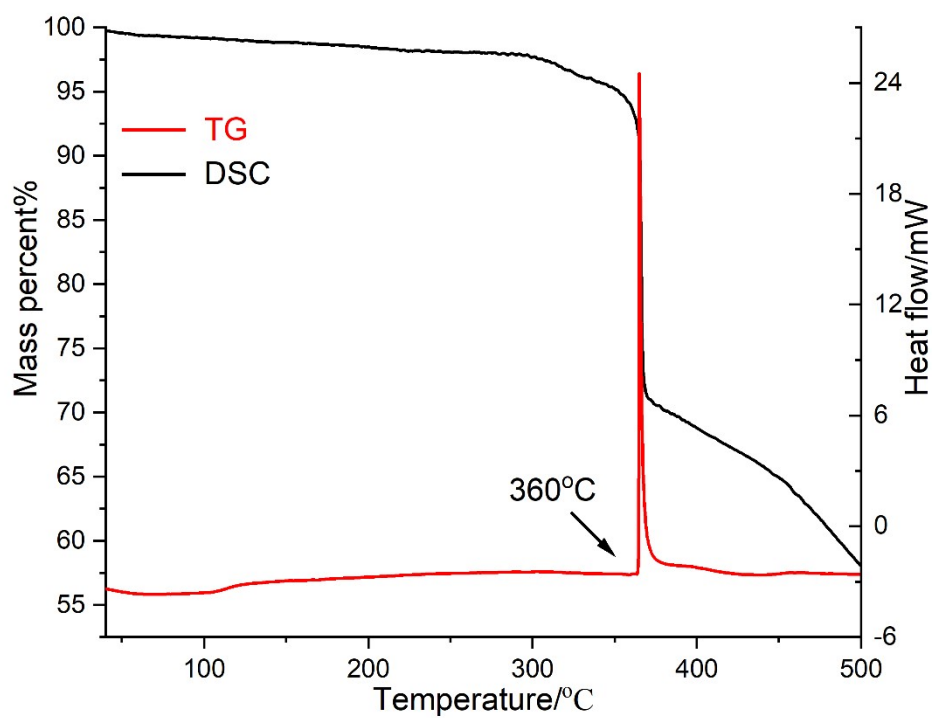

Figure S11 TG and DSC of 5

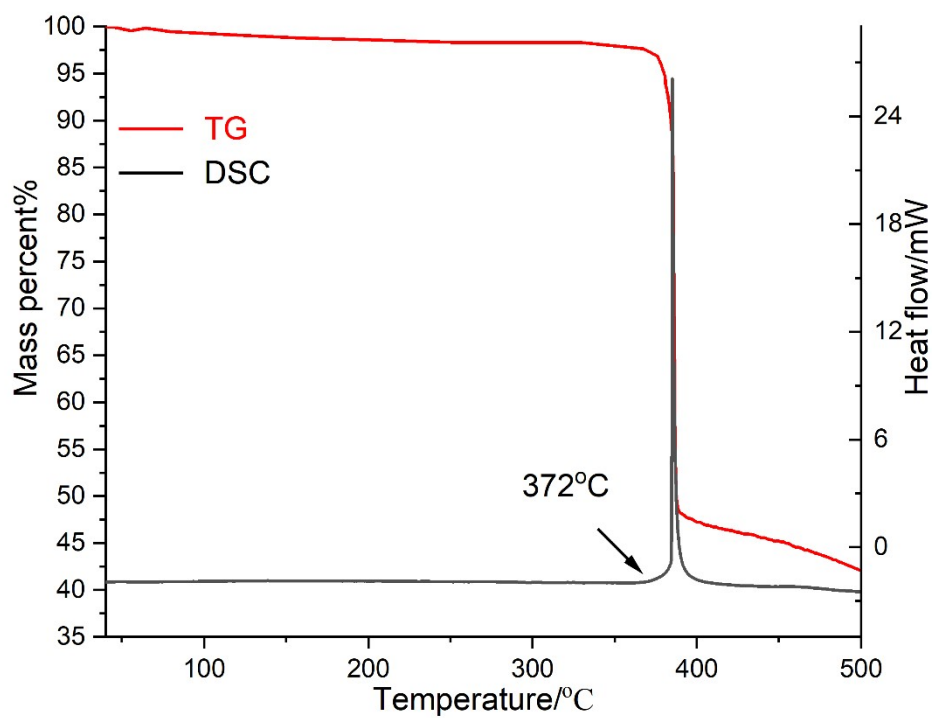

Figure S12 TG and DSC of 6

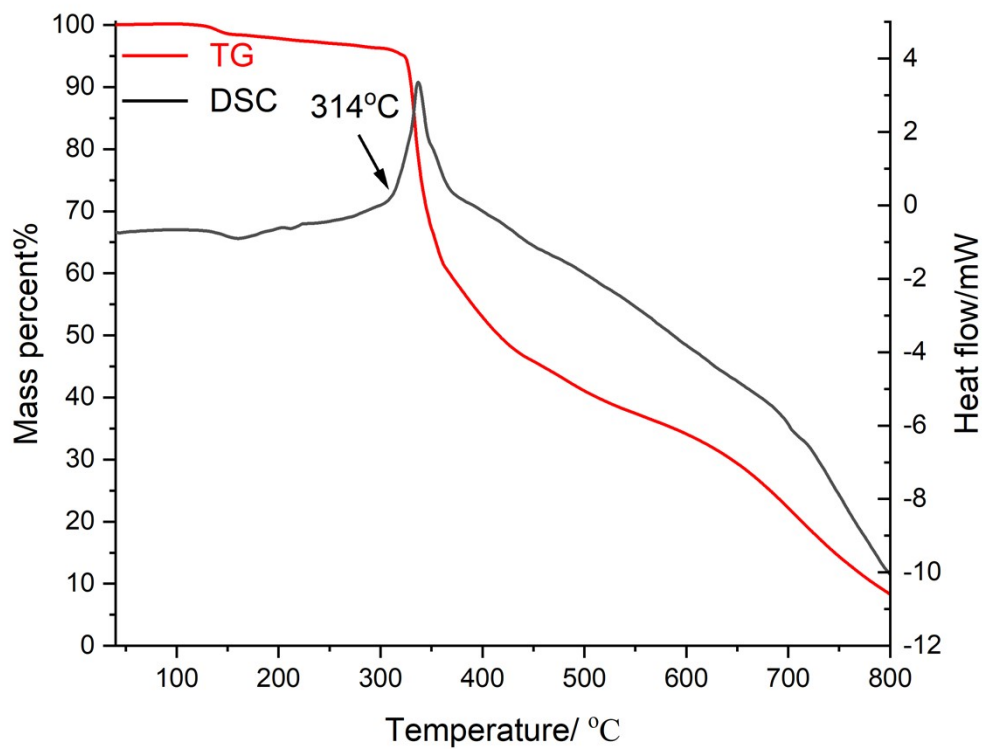

Figure S13 TG and DSC of 7

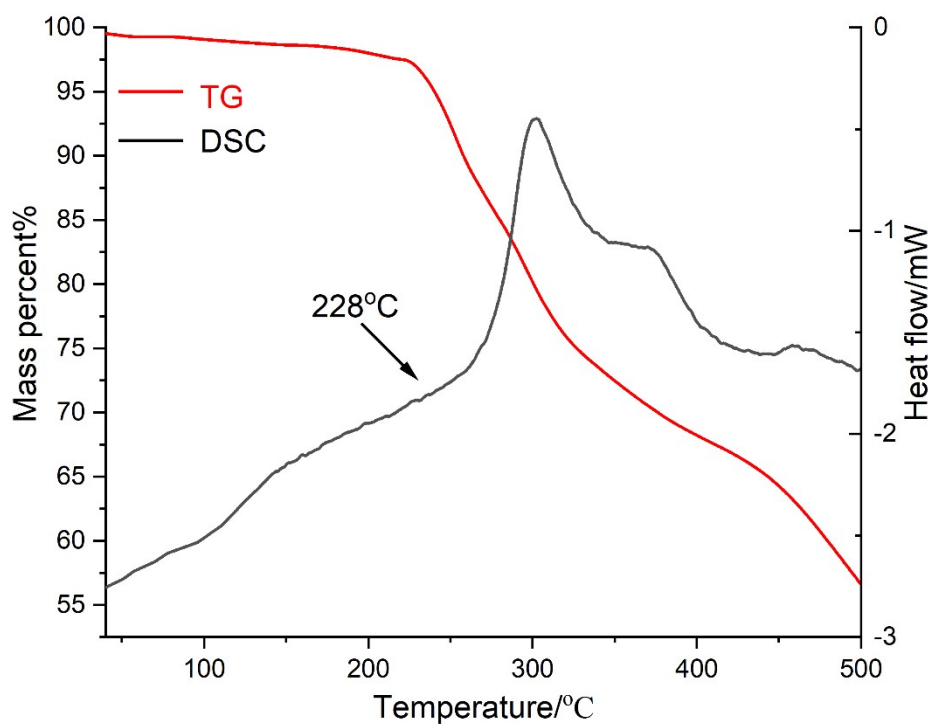

Figure S14 TG and DSC of 10



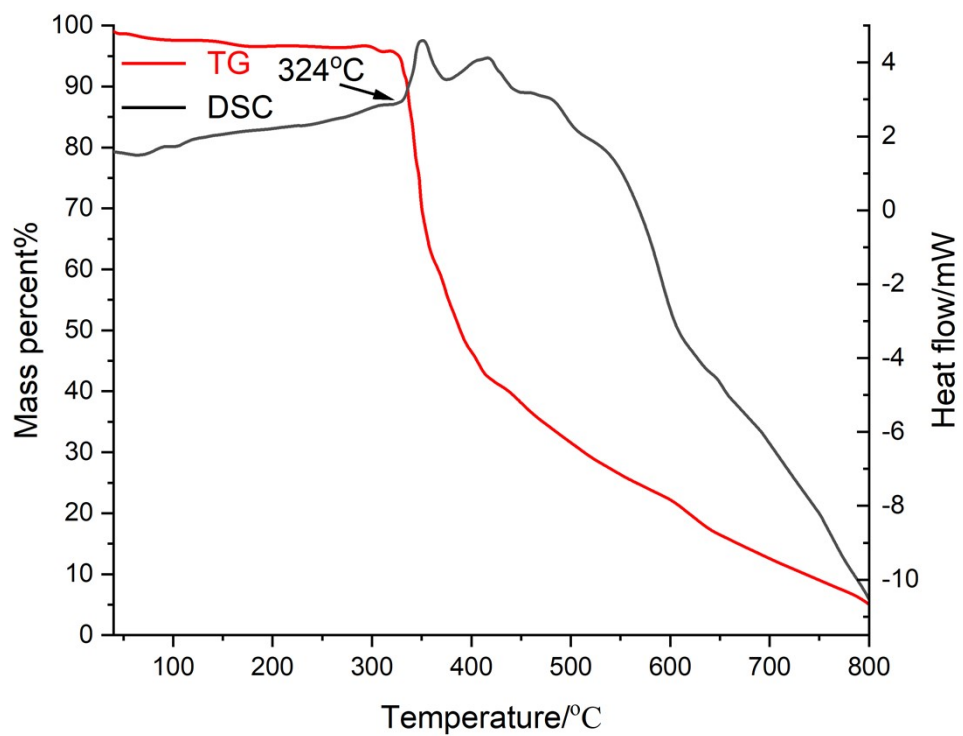

Figure S15 TG and DSC of 11

5. The heat of combustion test of compounds 7 and 11.

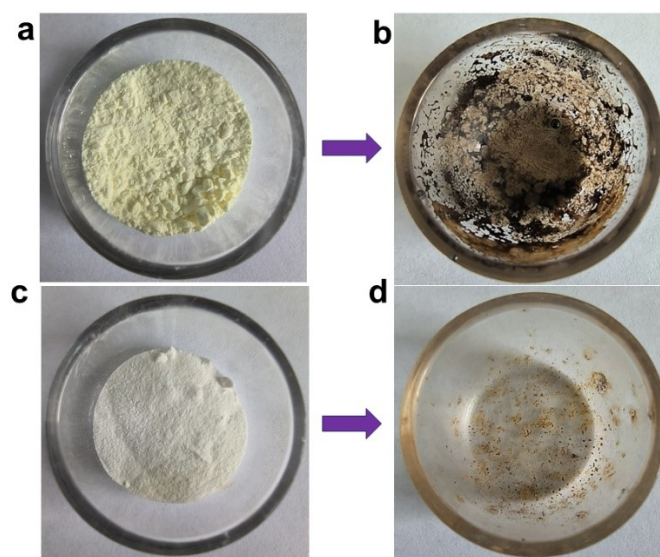

Scheme 2 a, c: the the sample of 7 and 11; b, d: the residue of the sample 7 and 11 after the heat of combustion test

| Compound  | pre-test<br>mass/g | residual<br>mass/g | mass<br>reduction/% | heat of combustion<br>value/ kJ mol <sup>-1</sup> | $\Delta_f H_m$<br>kJ mol <sup>-1</sup> / kJ g <sup>-1</sup> |
|-----------|--------------------|--------------------|---------------------|---------------------------------------------------|-------------------------------------------------------------|
| <b>7</b>  | 0.6447             | 0.0074             | 98.85               | 4149.38                                           | 572.6/1.98                                                  |
| <b>11</b> | 0.6893             | 0.0032             | 99.54               | 6456.25                                           | 1162.5/2.74                                                 |

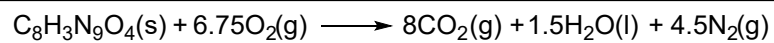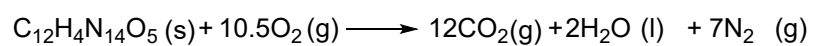

**Table S10** the sample mass and heat of combustion value of **7** and **11**
